# Supplementary material for: Probing the aggregation behavior of 4-aminophthalimide and 4-(N,N-dimethyl) amino-N-methylphthalimide: a combined photophysical, crystallographic, microscopic and theoretical (DFT) study
Source: Royal Society of Chemistry journal article supplement (doi:10.1039/c4cp01912a), 2014-07-14
Supplement: c4cp01912a1.pdf [file c4cp01912a1.pdf]

Supporting information for

Probing the aggregation behavior of 4-Aminophthalimide and 4-(N, N-dimethyl) amino-N-methylphthalimide: A combined photophysical, crystallographic, microscopic and theoretical (DFT) study

Debashis Majhi,<sup>†</sup> Sudhir Kumar Das,<sup>†</sup> Prabhat Kumar Sahu,<sup>†</sup> Saied Md Pratik<sup>‡</sup>, Arun Kumar<sup>†</sup> and Moloy Sarkar<sup>†\*</sup>

Table S1. Crystal data and structure refinement for DMP

|                                 |                                          |
|---------------------------------|------------------------------------------|
| Identification code             | sudhri_1                                 |
| Empirical formula               | C11 H12 N2 O2                            |
| Formula weight                  | 204.23                                   |
| Temperature                     | 296(2) K                                 |
| Wavelength                      | 0.71073 Å                                |
| Crystal system                  | Monoclinic                               |
| Space group                     | P21/n                                    |
| Unit cell dimensions            | a = 7.7124(4) Å                          |
|                                 | b = 8.9272(4) Å                          |
|                                 | c = 14.9003(7) Å                         |
|                                 | $\alpha = 90^\circ$ .                    |
|                                 | $\beta = 97.869(3)^\circ$ .              |
|                                 | $\gamma = 90^\circ$ .                    |
| Volume                          | 1016.23(8) Å <sup>3</sup>                |
| Z                               | 4                                        |
| Density (calculated)            | 1.335 Mg/m <sup>3</sup>                  |
| Absorption coefficient          | 0.094 mm <sup>-1</sup>                   |
| F(000)                          | 432                                      |
| Crystal size                    | 0.12 x 0.09 x 0.07 mm <sup>3</sup>       |
| Theta range for data collection | 2.67 to 29.21°.                          |
| Index ranges                    | -10 ≤ h ≤ 10, -12 ≤ k ≤ 12, -20 ≤ l ≤ 20 |

|                                   |                                             |
|-----------------------------------|---------------------------------------------|
| Reflections collected             | 17324                                       |
| Independent reflections           | 2735 [R(int) = 0.0363]                      |
| Completeness to theta = 29.21°    | 99.1 %                                      |
| Absorption correction             | Empirical                                   |
| Max. and min. transmission        | 0.9935 and 0.9888                           |
| Refinement method                 | Full-matrix least-squares on F <sup>2</sup> |
| Data / restraints / parameters    | 2735 / 0 / 136                              |
| Goodness-of-fit on F <sup>2</sup> | 1.042                                       |
| Final R indices [I>2sigma(I)]     | R1 = 0.0531, wR2 = 0.1471                   |
| R indices (all data)              | R1 = 0.0712, wR2 = 0.1591                   |
| Largest diff. peak and hole       | 0.303 and -0.256 e.Å <sup>-3</sup>          |

Table S2. Bond lengths [Å] and angles [°] for DMP

| Bond lengths [Å] |            | Bond angles [°] |            | Torsion angles [°]  |             |
|------------------|------------|-----------------|------------|---------------------|-------------|
| C(1)-C(2)        | 1.386(2)   | C(2)-C(1)-C(6)  | 119.23(14) | C(6)-C(1)-C(2)-C(3) | -0.1(2)     |
| C(1)-C(6)        | 1.3904(19) | C(2)-C(1)-C(8)  | 132.28(14) | C(8)-C(1)-C(2)-C(3) | -179.96(17) |
| C(1)-C(8)        | 1.468(2)   | C(6)-C(1)-C(8)  | 108.49(14) | C(1)-C(2)-C(3)-C(4) | 0.0(3)      |
| C(2)-C(3)        | 1.376(2)   | C(3)-C(2)-C(1)  | 118.82(14) | C(2)-C(3)-C(4)-N(2) | 179.60(16)  |
| C(3)-C(4)        | 1.415(2)   | C(2)-C(3)-C(4)  | 122.46(15) | C(2)-C(3)-C(4)-C(5) | 0.0(2)      |
| C(4)-N(2)        | 1.365(2)   | N(2)-C(4)-C(3)  | 121.08(15) | N(2)-C(4)-C(5)-C(6) | -179.44(15) |
| C(4)-C(5)        | 1.417(2)   | N(2)-C(4)-C(5)  | 121.03(14) | C(3)-C(4)-C(5)-C(6) | 0.1(2)      |
| C(5)-C(6)        | 1.367(2)   | C(3)-C(4)-C(5)  | 117.89(14) | C(4)-C(5)-C(6)-C(1) | -0.3(2)     |
| C(6)-C(7)        | 1.490(2)   | C(6)-C(5)-C(4)  | 118.33(13) | C(4)-C(5)-C(6)-C(7) | 179.10(14)  |
| C(7)-O(1)        | 1.205(2)   | C(5)-C(6)-C(1)  | 123.27(14) | C(2)-C(1)-C(6)-C(5) | 0.3(2)      |
| C(7)-N(1)        | 1.388(2)   | C(5)-C(6)-C(7)  | 129.10(13) | C(8)-C(1)-C(6)-C(5) | -179.83(14) |
| C(8)-O(2)        | 1.215(2)   | C(1)-C(6)-C(7)  | 107.62(13) | C(2)-C(1)-C(6)-C(7) | -179.22(14) |
| C(8)-N(1)        | 1.397(2)   | O(1)-C(7)-N(1)  | 125.23(15) | C(8)-C(1)-C(6)-C(7) | 0.67(16)    |
| C(9)-N(2)        | 1.444(2)   | O(1)-C(7)-C(6)  | 128.89(15) | C(5)-C(6)-C(7)-O(1) | -0.9(3)     |
| C(10)-N(2)       | 1.450(2)   | N(1)-C(7)-C(6)  | 105.87(12) | C(1)-C(6)-C(7)-O(1) | 178.60(17)  |
| C(11)-N(1)       | 1.453(2)   | O(2)-C(8)-N(1)  | 123.60(16) | C(5)-C(6)-C(7)-N(1) | 179.89(15)  |
|                  |            | O(2)-C(8)-C(1)  | 130.24(16) | C(1)-C(6)-C(7)-N(1) | -0.65(16)   |
|                  |            | N(1)-C(8)-C(1)  | 106.15(13) | C(2)-C(1)-C(8)-O(2) | 0.0(3)      |
|                  |            | C(7)-N(1)-C(8)  | 111.86(13) | C(6)-C(1)-C(8)-O(2) | -179.87(17) |

|  |  |                 |            |                      |             |
|--|--|-----------------|------------|----------------------|-------------|
|  |  | C(7)-N(1)-C(11) | 124.05(14) | C(2)-C(1)-C(8)-N(1)  | 179.42(17)  |
|  |  | C(8)-N(1)-C(11) | 124.10(14) | C(6)-C(1)-C(8)-N(1)  | -0.44(17)   |
|  |  | C(4)-N(2)-C(9)  | 121.17(15) | O(1)-C(7)-N(1)-C(8)  | -178.91(16) |
|  |  | C(4)-N(2)-C(10) | 120.48(15) | C(6)-C(7)-N(1)-C(8)  | 0.38(17)    |
|  |  | C(9)-N(2)-C(10) | 118.07(15) | O(1)-C(7)-N(1)-C(11) | 1.3(3)      |
|  |  |                 |            | C(6)-C(7)-N(1)-C(11) | -179.42(14) |
|  |  |                 |            | O(2)-C(8)-N(1)-C(7)  | 179.49(16)  |
|  |  |                 |            | C(1)-C(8)-N(1)-C(7)  | 0.02(18)    |
|  |  |                 |            | O(2)-C(8)-N(1)-C(11) | -0.7(3)     |
|  |  |                 |            | C(1)-C(8)-N(1)-C(11) | 179.82(14)  |
|  |  |                 |            | C(3)-C(4)-N(2)-C(9)  | 173.92(17)  |
|  |  |                 |            | C(5)-C(4)-N(2)-C(9)  | -6.5(3)     |
|  |  |                 |            | C(3)-C(4)-N(2)-C(10) | 0.2(3)      |
|  |  |                 |            | C(5)-C(4)-N(2)-C(10) | 179.73(15)  |

Symmetry transformations used to generate equivalent atoms

**Table S3.** Distance [ $\text{\AA}$ ] of each atom from the mean plane in DMP and AP molecules (generated by Diamond 3.1e software)

| DMP                                                                                 |                                           | AP                                                                                   |                                           |
|-------------------------------------------------------------------------------------|-------------------------------------------|--------------------------------------------------------------------------------------|-------------------------------------------|
| 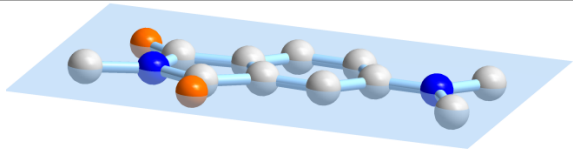 |                                           |  |                                           |
| Atoms                                                                               | Distance from mean plane [ $\text{\AA}$ ] | Atoms                                                                                | Distance from mean plane [ $\text{\AA}$ ] |
| C11                                                                                 | -0.0106                                   | O1                                                                                   | 0.0007                                    |
| N1                                                                                  | -0.0034                                   | C1                                                                                   | 0.0160                                    |
| O1                                                                                  | 0.0313                                    | N1                                                                                   | 0.0315                                    |
| O2                                                                                  | -0.0091                                   | C6                                                                                   | 0.0053                                    |
| C8                                                                                  | -0.0095                                   | O2                                                                                   | -0.0388                                   |
| C7                                                                                  | 0.0055                                    | C7                                                                                   | 0.0136                                    |
| C6                                                                                  | -0.0041                                   | C8                                                                                   | 0.0010                                    |
| C1                                                                                  | -0.0035                                   | C2                                                                                   | -0.0285                                   |
| C5                                                                                  | -0.0025                                   | C3                                                                                   | -0.0318                                   |
| C2                                                                                  | 0.0050                                    | C4                                                                                   | 0.0034                                    |
| C3                                                                                  | 0.0094                                    | C5                                                                                   | 0.0108                                    |
| C4                                                                                  | 0.0060                                    | N2                                                                                   | 0.0374                                    |
| N2                                                                                  | 0.0194                                    |                                                                                      |                                           |
| C9                                                                                  | -0.1149                                   |                                                                                      |                                           |
| C10                                                                                 | 0.0336                                    |                                                                                      |                                           |

**Table S4.** Angle between two planes in DMP molecule (generated by Diamond 3.1e software)

|                   |                                            |        |                    |
|-------------------|--------------------------------------------|--------|--------------------|
| Value             | <b>3.355(71)°</b>                          |        |                    |
| Plane normal      | m1=-0.9085(3) m2=0.2701(6) m3=-0.3188(6)   |        |                    |
| Dist. from origin | d=-0.5511(26) Å                            |        |                    |
| Const. atoms      | d [Å]                                      | s [Å]  | (d/s) <sup>2</sup> |
| C5                | -0.0010                                    | 0.0015 | 0.4181             |
| C6                | 0.0014                                     | 0.0014 | 0.9229             |
| C1                | -0.0010                                    | 0.0015 | 0.4917             |
| C2                | 0.0001                                     | 0.0016 | 0.0054             |
| C3                | 0.0004                                     | 0.0016 | 0.0758             |
| C4                | 0.0000                                     | 0.0015 | 0.0002             |
| Plane normal      | m1=-0.9133(4) m2=0.3039(11) m3=-0.2713(11) |        |                    |
| Dist. from origin | d=-0.4024(40) Å                            |        |                    |
| Const. atoms      | d [Å]                                      | s [Å]  | (d/s) <sup>2</sup> |
| C9                | -0.0205                                    | 0.0023 | 77.6338            |
| N2                | 0.0278                                     | 0.0015 | 324.0431           |
| C4                | -0.0091                                    | 0.0015 | 37.4456            |
| C10               | -0.0193                                    | 0.0023 | 72.1807            |

**Table S5.** Angle between two planes of AP molecule (generated by Diamond 3.1e software)

|                   |                                                 |        |                    |
|-------------------|-------------------------------------------------|--------|--------------------|
| Value             | <b>5.20(8)°</b>                                 |        |                    |
| Plane normal      | m1=-0.4073(17) m2=-0.0265(18) m3=-0.9129(8)     |        |                    |
| Dist. from origin | d=-7.4363(230) Å                                |        |                    |
| Const. atoms      | d [Å]                                           | s [Å]  | (d/s) <sup>2</sup> |
| C4                | 0.0093                                          | 0.0045 | 4.3219             |
| C3                | -0.0050                                         | 0.0041 | 1.4363             |
| C2                | -0.0024                                         | 0.0048 | 0.2534             |
| C8                | 0.0056                                          | 0.0041 | 1.7996             |
| C7                | -0.0025                                         | 0.0042 | 0.3488             |
| C5                | -0.0051                                         | 0.0045 | 1.3076             |
| Plane normal      | m1=-0.3376(595) m2=-0.0789(202) m3=-0.9380(198) |        |                    |
| Dist. from origin | d=-7.4652(2836) Å                               |        |                    |
| Const. atoms      | d [Å]                                           | s [Å]  | (d/s) <sup>2</sup> |
| H2A               | 0.0780                                          | 0.0727 | 1.1515             |
| N2                | -0.0011                                         | 0.0051 | 0.0465             |
| C4                | 0.0002                                          | 0.0045 | 0.0021             |
| H2B               | 0.0906                                          | 0.0727 | 1.5566             |

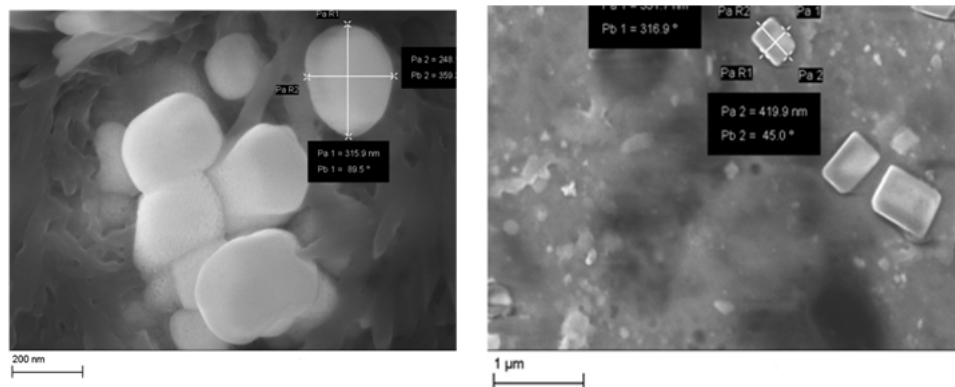

**Fig. S1** FESEM (a) AP and (b) DMP aggregates at higher temperature ( $T=65^{\circ}\text{C}$ ) in 99% water-DMSO system.

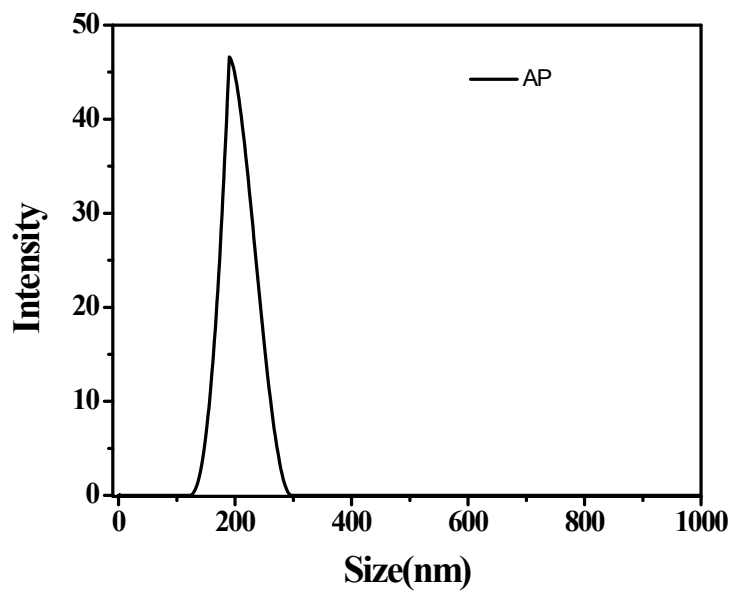

**Fig. S2** The DLS data of AP aggregate at room temperature in 99% water-DMSO system.

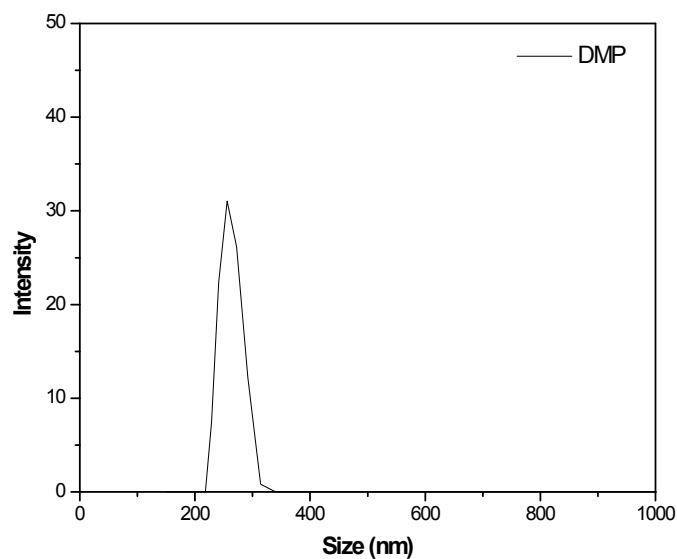

**Fig. S3** The DLS data of DMP aggregate at room temperature in 99% water-DMSO system.

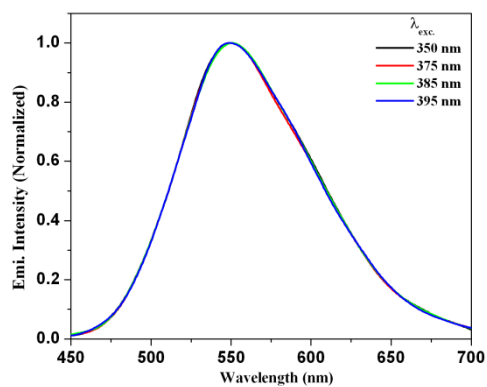

**Fig. S4** Emission spectra of AP aggregates at different excitation wavelength ( $\lambda_{exc}$ ).

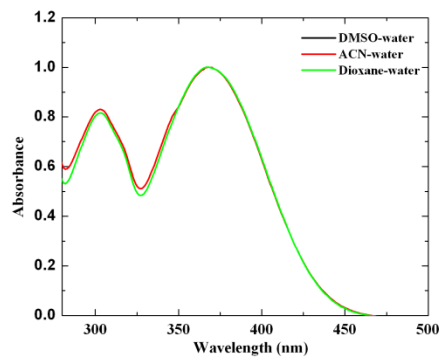

**Fig. S5** Absorption spectra in aggregated form of AP in different 99% water-solvent medium at room temperature. Spectra are normalized corresponding to second peak maxima

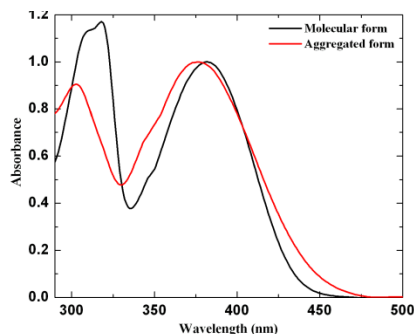

**Fig. S6** Absorption spectra of 5-amino-2-methylisoindolne-1, 3-dione in molecular form in DMSO ( $5 \times 10^{-6}$  M) solution and in aggregated form in 99% water-DMSO medium at room temperature. Spectra are normalized corresponding to second peak maxima.

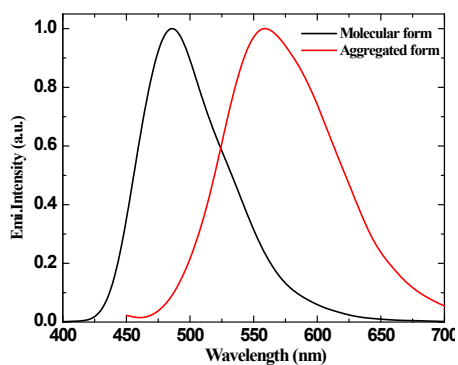

**Fig. S7** Emission spectra of 5-amino-2-methylisoindolne-1, 3-dione in molecular form in DMSO ( $5 \times 10^{-6}$  M) solution and in aggregated form in 99% water-DMSO medium at room temperature. Spectra are normalized corresponding to second peak maxima.

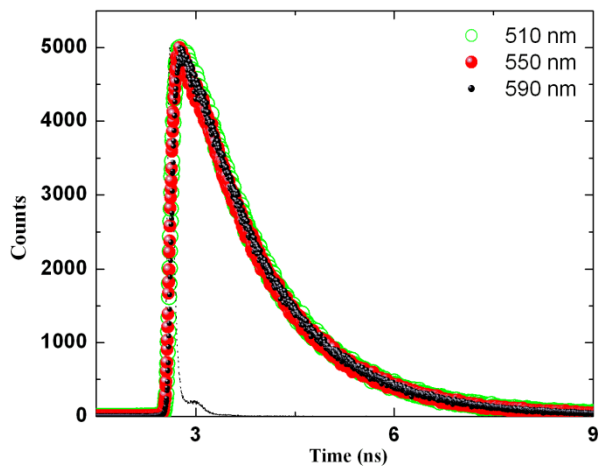

**Fig. S8** Wavelength dependent fluorescence decay profiles of AP in aggregated forms at room temperature.  $\lambda_{\text{exc.}} = 375 \text{ nm}$ .

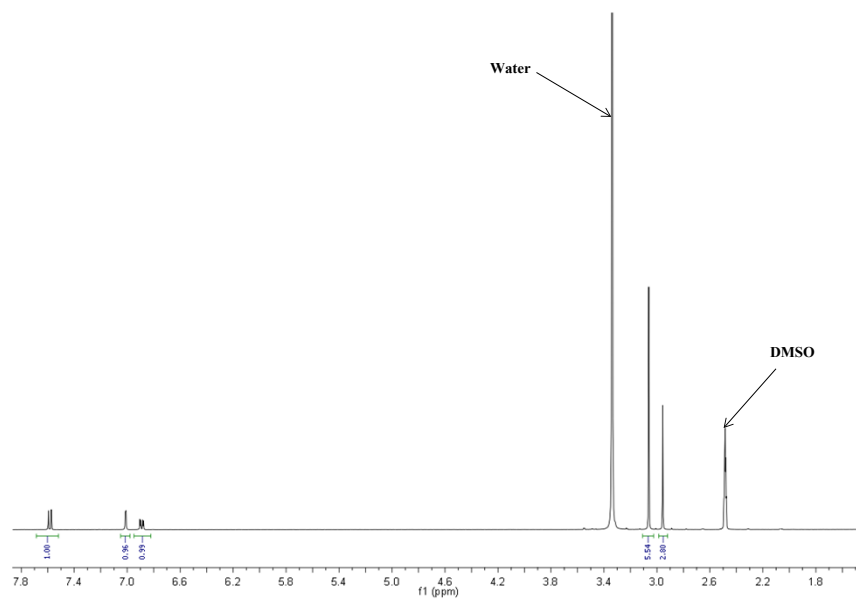

**Fig. S9**  $^1\text{H}$  NMR spectra of DMP in  $\text{DMSO-d}_6$ .



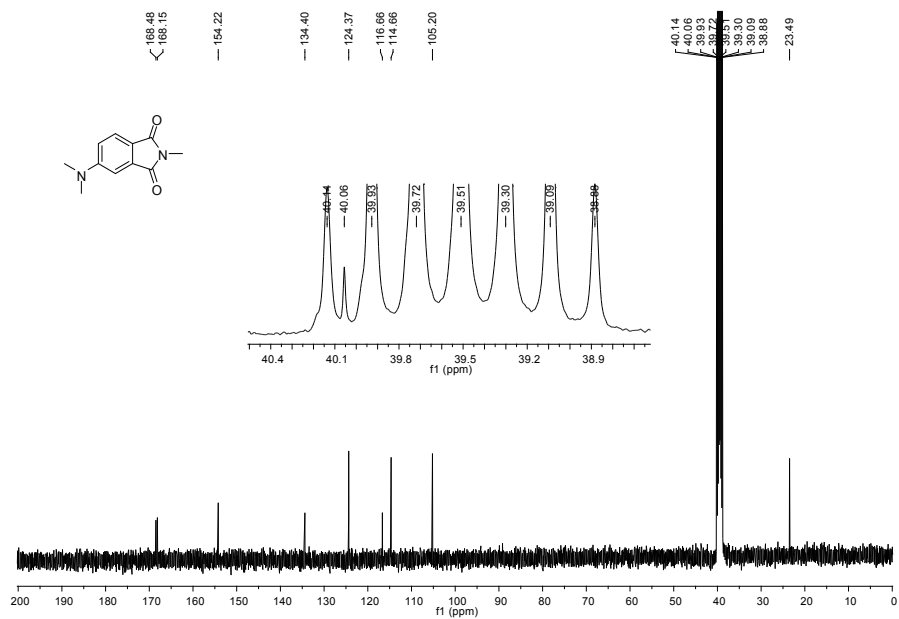

**Fig. S10**  $^{13}\text{C}$  NMR spectra of DMP in  $\text{DMSO-d}_6$ .

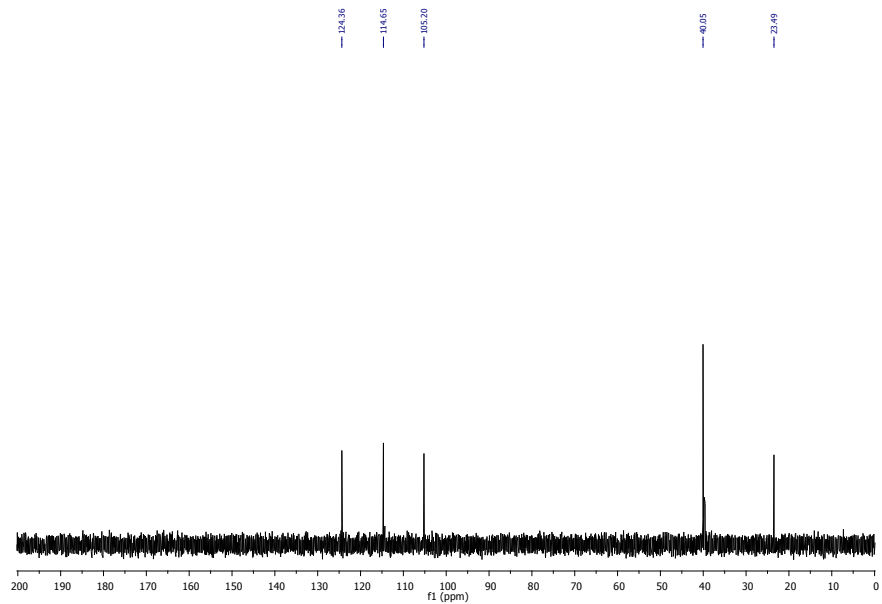

DEPT-135

**Fig. S11** DEPT135 NMR spectra of DMP in  $\text{DMSO-d}_6$ .

Cartesian coordinates, energies and low frequencies for the optimized structures and Cartesian coordinates and energies for the hydrogen atoms optimized structures in M06-2X/6-31+G (d, p) level of theory.

**AP monomer:-**

| Center<br>Number | Atomic<br>Number | Coordinates (Angstroms) |           |           |
|------------------|------------------|-------------------------|-----------|-----------|
|                  |                  | X                       | Y         | Z         |
| 1                | 7                | -3.586254               | 0.461110  | -0.054174 |
| 2                | 1                | -4.285742               | -0.211761 | 0.219240  |
| 3                | 1                | -3.796921               | 1.410206  | 0.214054  |
| 4                | 6                | -0.614879               | -1.740835 | -0.001759 |
| 5                | 1                | -0.372215               | -2.798693 | -0.000118 |
| 6                | 6                | -1.936539               | -1.307290 | -0.003437 |
| 7                | 1                | -2.742913               | -2.035359 | -0.009148 |
| 8                | 6                | -2.264802               | 0.064977  | -0.004111 |
| 9                | 8                | 2.549574                | -1.911270 | 0.005898  |
| 10               | 8                | 1.492076                | 2.557453  | 0.001009  |
| 11               | 7                | 2.352668                | 0.401564  | 0.002118  |
| 12               | 1                | 3.336862                | 0.630188  | 0.004701  |
| 13               | 6                | 1.866353                | -0.915525 | 0.002567  |
| 14               | 6                | -1.237067               | 1.029378  | -0.005740 |
| 15               | 1                | -1.457224               | 2.093032  | -0.012250 |
| 16               | 6                | 1.340921                | 1.359566  | -0.000278 |
| 17               | 6                | 0.063562                | 0.573934  | -0.003595 |
| 18               | 6                | 0.385794                | -0.780171 | -0.001538 |

Energy = -568.2568613 Hartree

Low Frequencies: -    111.6034    145.1662    165.4414  
                               209.0887    275.0683    332.5909  
                               357.9842    382.7124    427.5363

**AP linear dimer:-**

| Center<br>Number | Atomic<br>Number | Coordinates (Angstroms) |           |           |
|------------------|------------------|-------------------------|-----------|-----------|
|                  |                  | X                       | Y         | Z         |
| 1                | 7                | 1.072348                | 2.895064  | -1.148079 |
| 2                | 1                | 1.238521                | 3.888748  | -1.164202 |
| 3                | 1                | 0.126034                | 2.628263  | -0.921097 |
| 4                | 6                | 4.469822                | 1.775020  | -0.400952 |
| 5                | 1                | 5.484700                | 2.160946  | -0.392536 |
| 6                | 6                | 3.407372                | 2.579808  | -0.746582 |
| 7                | 1                | 3.576332                | 3.617118  | -1.020524 |
| 8                | 6                | 2.089064                | 2.075817  | -0.763633 |
| 9                | 8                | 6.348741                | -0.599837 | 0.472459  |
| 10               | 8                | 2.091081                | -2.234902 | 0.580232  |
| 11               | 7                | 4.336684                | -1.727214 | 0.578447  |
| 12               | 1                | 4.690930                | -2.613323 | 0.909904  |
| 13               | 6                | 5.128912                | -0.621200 | 0.340624  |
| 14               | 6                | 1.855659                | 0.749211  | -0.394906 |
| 15               | 1                | 0.845201                | 0.347854  | -0.397252 |
| 16               | 6                | 2.986389                | -1.448640 | 0.386634  |
| 17               | 6                | 2.932717                | -0.037863 | -0.052725 |
| 18               | 6                | 4.223638                | 0.460361  | -0.060386 |
| 19               | 8                | -6.343179               | 0.601897  | -0.501037 |
| 20               | 8                | -2.687901               | 1.915164  | 1.892091  |

|    |   |           |           |           |
|----|---|-----------|-----------|-----------|
| 21 | 7 | -4.660937 | 1.553075  | 0.762256  |
| 22 | 1 | -5.177079 | 2.349596  | 1.106791  |
| 23 | 7 | -0.708447 | -2.701581 | -0.368250 |
| 24 | 1 | -0.709273 | -3.554122 | -0.901199 |
| 25 | 1 | 0.155701  | -2.442494 | 0.091509  |
| 26 | 6 | -5.197200 | 0.583807  | -0.062604 |
| 27 | 6 | -4.138596 | -1.598979 | -0.979667 |
| 28 | 1 | -5.024992 | -1.915304 | -1.521552 |
| 29 | 6 | -2.989493 | -2.357471 | -0.993786 |
| 30 | 1 | -2.956214 | -3.286827 | -1.554731 |
| 31 | 6 | -1.834967 | -1.940975 | -0.296748 |
| 32 | 6 | -1.868605 | -0.757040 | 0.443157  |
| 33 | 1 | -1.005225 | -0.444449 | 1.025469  |
| 34 | 6 | -3.354393 | 1.251115  | 1.135708  |
| 35 | 6 | -3.028157 | -0.014032 | 0.443487  |
| 36 | 6 | -4.147512 | -0.420604 | -0.261148 |

Energy = -1136.5202759 Hartree.

### **AP $\pi$ – stacked dimer:-**

| Center | Atomic | Coordinates (Angstroms) |           |           |
|--------|--------|-------------------------|-----------|-----------|
| Number | Number | X                       | Y         | Z         |
| 1      | 7      | 4.228264                | -1.056292 | 0.545239  |
| 2      | 1      | 5.127978                | -0.835059 | 0.145902  |
| 3      | 1      | 4.289227                | -1.508316 | 1.445730  |
| 4      | 6      | 2.365967                | 1.754877  | -0.863547 |
| 5      | 1      | 2.453292                | 2.489851  | -1.658345 |
| 6      | 6      | 3.335299                | 0.795503  | -0.673922 |

|    |   |           |           |           |
|----|---|-----------|-----------|-----------|
| 7  | 1 | 4.208325  | 0.767328  | -1.320467 |
| 8  | 6 | 3.228995  | -0.148985 | 0.369558  |
| 9  | 8 | -0.178370 | 3.606521  | -0.687796 |
| 10 | 8 | -2.927293 | 1.339745  | -1.762732 |
| 11 | 8 | -0.643867 | 0.482022  | 2.603651  |
| 12 | 8 | -3.392791 | -1.784752 | 1.528715  |
| 13 | 7 | -0.677041 | 2.207731  | 1.080054  |
| 14 | 7 | -3.425978 | -0.059054 | 0.005112  |
| 15 | 1 | -1.578115 | 2.600174  | 1.314646  |
| 16 | 1 | -4.325339 | 0.331742  | 0.246239  |
| 17 | 7 | 1.479501  | -3.322967 | -0.529672 |
| 18 | 1 | 2.398060  | -3.073708 | -0.866543 |
| 19 | 1 | 1.487350  | -3.847802 | 0.331711  |
| 20 | 6 | 0.106686  | 2.656993  | 0.035363  |
| 21 | 6 | -2.642231 | 0.390225  | -1.039565 |
| 22 | 6 | -0.382950 | -0.511894 | -1.938481 |
| 23 | 1 | -0.291697 | 0.227715  | -2.729235 |
| 24 | 6 | 0.586413  | -1.471234 | -1.748850 |
| 25 | 1 | 1.461018  | -1.498900 | -2.393005 |
| 26 | 6 | 0.480058  | -2.415769 | -0.705380 |
| 27 | 6 | 2.108680  | -0.128917 | 1.203151  |
| 28 | 6 | -0.640279 | -2.395782 | 0.128143  |
| 29 | 1 | 1.993451  | -0.856751 | 2.003326  |
| 30 | 1 | -0.748348 | -3.111412 | 0.939249  |
| 31 | 6 | -0.124778 | 1.089885  | 1.699030  |
| 32 | 6 | -2.873701 | -1.176888 | 0.624095  |

|    |   |           |           |           |
|----|---|-----------|-----------|-----------|
| 33 | 6 | 1.151268  | 0.838955  | 0.995509  |
| 34 | 6 | -1.597642 | -1.427803 | -0.079412 |
| 35 | 6 | 1.276079  | 1.773877  | -0.016967 |
| 36 | 6 | -1.472840 | -0.492891 | -1.091897 |

Energy = -1136.5204623Hartree.

### DMP monomer:-

| Center<br>Number | Atomic<br>Number | Coordinates (Angstroms) |           |           |
|------------------|------------------|-------------------------|-----------|-----------|
|                  |                  | X                       | Y         | Z         |
| 1                | 6                | 0.761419                | -0.934381 | -0.004426 |
| 2                | 6                | -0.225396               | -1.907523 | -0.004293 |
| 3                | 1                | 0.031833                | -2.962129 | 0.000660  |
| 4                | 6                | -1.556406               | -1.502367 | -0.009240 |
| 5                | 1                | -2.327112               | -2.262726 | -0.007186 |
| 6                | 6                | -1.922667               | -0.129937 | -0.017202 |
| 7                | 6                | -0.893821               | 0.849287  | -0.011122 |
| 8                | 6                | -3.587983               | 1.653090  | 0.012369  |
| 9                | 1                | -4.672163               | 1.752930  | -0.021822 |
| 10               | 1                | -3.170311               | 2.191744  | -0.846414 |
| 11               | 1                | -3.225740               | 2.132543  | 0.931274  |
| 12               | 6                | -4.283023               | -0.759174 | 0.025118  |
| 13               | 1                | -5.253819               | -0.265155 | 0.007845  |
| 14               | 1                | -4.219279               | -1.359782 | 0.942158  |
| 15               | 1                | -4.232117               | -1.436017 | -0.836391 |
| 16               | 7                | -3.240890               | 0.245758  | -0.031719 |
| 17               | 1                | 4.345204                | 1.245836  | 0.898894  |
| 18               | 1                | -1.103756               | 1.911761  | -0.009094 |

|    |   |          |           |           |
|----|---|----------|-----------|-----------|
| 19 | 6 | 0.410860 | 0.411504  | -0.006598 |
| 20 | 6 | 1.675408 | 1.216243  | -0.000922 |
| 21 | 6 | 2.241760 | -1.035654 | 0.002147  |
| 22 | 6 | 4.111884 | 0.657513  | 0.008471  |
| 23 | 1 | 4.691535 | -0.266096 | 0.008518  |
| 24 | 1 | 4.349971 | 1.248931  | -0.878619 |
| 25 | 7 | 2.712462 | 0.289584  | 0.003828  |
| 26 | 8 | 1.812990 | 2.418775  | -0.000571 |
| 27 | 8 | 2.948577 | -2.017630 | 0.005521  |

Energy = -686.1250314Hartree.

|               |          |          |          |
|---------------|----------|----------|----------|
| Frequencies - | 33.6961  | 56.8188  | 79.3615  |
|               | 93.7244  | 122.6746 | 151.5639 |
|               | 155.5667 | 173.7645 | 216.5212 |

### DMP linear dimer:-

| Center | Atomic | Coordinates (Angstroms) |           |           |
|--------|--------|-------------------------|-----------|-----------|
| Number | Number | X                       | Y         | Z         |
| 1      | 6      | 4.466207                | 1.903656  | 0.024813  |
| 2      | 6      | 5.259212                | 0.744243  | -0.164001 |
| 3      | 1      | 6.342421                | 0.786878  | -0.185583 |
| 4      | 6      | 4.625900                | -0.457573 | -0.312178 |
| 5      | 6      | 6.466398                | 3.314470  | 0.040095  |
| 6      | 1      | 6.705122                | 4.371754  | 0.141205  |
| 7      | 1      | 7.027794                | 2.764733  | 0.806417  |
| 8      | 1      | 6.816707                | 2.977460  | -0.944510 |
| 9      | 6      | 4.218725                | 4.308289  | 0.387793  |
| 10     | 1      | 4.863196                | 5.167046  | 0.568711  |

|    |   |           |           |           |
|----|---|-----------|-----------|-----------|
| 11 | 1 | 3.591577  | 4.523596  | -0.488180 |
| 12 | 1 | 3.562392  | 4.189937  | 1.257635  |
| 13 | 7 | 5.041561  | 3.130758  | 0.189946  |
| 14 | 8 | 6.375797  | -2.133541 | -0.553547 |
| 15 | 6 | 3.242845  | -0.598579 | -0.292514 |
| 16 | 6 | -3.296550 | 0.683790  | 0.278041  |
| 17 | 6 | 2.450935  | 0.523871  | -0.108866 |
| 18 | 6 | -3.919781 | 1.790942  | -0.275611 |
| 19 | 1 | 1.366188  | 0.455523  | -0.073975 |
| 20 | 1 | -3.371264 | 2.714493  | -0.434622 |
| 21 | 6 | 3.060343  | 1.747333  | 0.045821  |
| 22 | 6 | -5.248976 | 1.701412  | -0.618369 |
| 23 | 1 | 2.425647  | 2.613449  | 0.188976  |
| 24 | 1 | -5.728038 | 2.573558  | -1.046013 |
| 25 | 6 | -6.004724 | 0.520849  | -0.427433 |
| 26 | 6 | -5.349864 | -0.600805 | 0.139836  |
| 27 | 1 | -5.863215 | -1.540047 | 0.312137  |
| 28 | 6 | -4.028530 | -0.482945 | 0.467845  |
| 29 | 6 | 5.214836  | -1.813178 | -0.503787 |
| 30 | 6 | -3.110854 | -1.500964 | 1.053276  |
| 31 | 6 | 2.916646  | -2.017185 | -0.483329 |
| 32 | 6 | -1.923201 | 0.452661  | 0.742531  |
| 33 | 6 | -8.128003 | -0.696043 | -0.474891 |
| 34 | 1 | -9.152142 | -0.516654 | -0.797250 |
| 35 | 1 | -7.762564 | -1.593609 | -0.989526 |
| 36 | 1 | -8.139263 | -0.903461 | 0.603383  |



|    |   |           |           |           |
|----|---|-----------|-----------|-----------|
| 37 | 6 | -7.977272 | 1.613805  | -1.370707 |
| 38 | 1 | -8.994838 | 1.343190  | -1.647174 |
| 39 | 1 | -8.022745 | 2.460108  | -0.671305 |
| 40 | 1 | -7.458406 | 1.945672  | -2.277652 |
| 41 | 6 | 4.267468  | -4.116748 | -0.808334 |
| 42 | 6 | -0.697649 | -1.506840 | 1.741036  |
| 43 | 1 | 3.260128  | -4.533473 | -0.819393 |
| 44 | 1 | -0.195411 | -0.802272 | 2.406850  |
| 45 | 1 | 4.767314  | -4.317180 | -1.758803 |
| 46 | 1 | -1.024673 | -2.386813 | 2.295684  |
| 47 | 1 | 4.851081  | -4.560802 | 0.001093  |
| 48 | 1 | -0.010497 | -1.811769 | 0.945736  |
| 49 | 7 | 4.138371  | -2.684425 | -0.602006 |
| 50 | 7 | -1.882011 | -0.869775 | 1.191292  |
| 51 | 7 | -7.320688 | 0.460556  | -0.786158 |
| 52 | 8 | -3.340841 | -2.647321 | 1.346381  |
| 53 | 8 | 1.838271  | -2.575622 | -0.529370 |
| 54 | 8 | -0.963453 | 1.197999  | 0.757565  |

Energy = -1372.2535855Hartree.

### **DMP $\pi$ – stacked dimer:-**

| Center | Atomic | Coordinates (Angstroms) |           |           |
|--------|--------|-------------------------|-----------|-----------|
| Number | Number | X                       | Y         | Z         |
| 1      | 1      | -4.586886               | 3.502514  | 1.511585  |
| 2      | 6      | -2.332433               | -0.081327 | 1.201757  |
| 3      | 6      | 2.332433                | 0.081327  | -1.201757 |
| 4      | 6      | -1.994215               | -1.414604 | 1.371204  |

|    |   |           |           |           |
|----|---|-----------|-----------|-----------|
| 5  | 6 | 1.994215  | 1.414604  | -1.371204 |
| 6  | 1 | -2.177064 | -1.917981 | 2.316055  |
| 7  | 1 | 2.177064  | 1.917981  | -2.316055 |
| 8  | 6 | -1.423123 | -2.092714 | 0.319406  |
| 9  | 6 | 1.423123  | 2.092714  | -0.319406 |
| 10 | 1 | -1.156518 | -3.132352 | 0.464797  |
| 11 | 1 | 1.156518  | 3.132352  | -0.464797 |
| 12 | 6 | -1.167242 | -1.480219 | -0.929880 |
| 13 | 6 | 1.167242  | 1.480219  | 0.929880  |
| 14 | 6 | -1.519862 | -0.116143 | -1.083827 |
| 15 | 6 | 1.519862  | 0.116143  | 1.083827  |
| 16 | 1 | -1.338386 | 0.420943  | -2.008474 |
| 17 | 1 | 1.338386  | -0.420943 | 2.008474  |
| 18 | 6 | -2.083097 | 0.532061  | -0.020812 |
| 19 | 6 | 2.083097  | -0.532061 | 0.020812  |
| 20 | 6 | -2.524155 | 1.951483  | 0.088410  |
| 21 | 6 | 2.524155  | -1.951483 | -0.088410 |
| 22 | 6 | -2.942036 | 0.905218  | 2.101971  |
| 23 | 6 | 2.942036  | -0.905218 | -2.101971 |
| 24 | 6 | -0.447044 | -1.596183 | -3.266386 |
| 25 | 6 | 0.447044  | 1.596183  | 3.266386  |
| 26 | 1 | 0.004532  | -2.326257 | -3.935727 |
| 27 | 1 | -0.004532 | 2.326257  | 3.935727  |
| 28 | 1 | 0.206296  | -0.714024 | -3.246322 |
| 29 | 1 | -0.206296 | 0.714024  | 3.246322  |
| 30 | 1 | -1.417226 | -1.296151 | -3.684777 |

|    |   |           |           |           |
|----|---|-----------|-----------|-----------|
| 31 | 1 | 1.417226  | 1.296151  | 3.684777  |
| 32 | 6 | -0.229912 | -3.571772 | -1.779612 |
| 33 | 6 | 0.229912  | 3.571772  | 1.779612  |
| 34 | 1 | 0.305212  | -3.910418 | -2.666008 |
| 35 | 1 | -0.305212 | 3.910418  | 2.666008  |
| 36 | 1 | -1.112398 | -4.212088 | -1.640592 |
| 37 | 1 | 1.112398  | 4.212088  | 1.640592  |
| 38 | 1 | 0.431482  | -3.704538 | -0.914046 |
| 39 | 1 | -0.431482 | 3.704538  | 0.914046  |
| 40 | 6 | -3.578778 | 3.332521  | 1.898727  |
| 41 | 6 | 3.578778  | -3.332521 | -1.898727 |
| 42 | 1 | -3.614942 | 3.243056  | 2.985023  |
| 43 | 1 | 3.614942  | -3.243056 | -2.985023 |
| 44 | 1 | 4.586886  | -3.502514 | -1.511585 |
| 45 | 1 | -2.940743 | 4.166821  | 1.600469  |
| 46 | 1 | 2.940743  | -4.166821 | -1.600469 |
| 47 | 7 | -3.026740 | 2.095042  | 1.374601  |
| 48 | 7 | 3.026740  | -2.095042 | -1.374601 |
| 49 | 7 | -0.590893 | -2.177968 | -1.952157 |
| 50 | 7 | 0.590893  | 2.177968  | 1.952157  |
| 51 | 8 | -2.462101 | 2.828583  | -0.736082 |
| 52 | 8 | 2.462101  | -2.828583 | 0.736082  |
| 53 | 8 | -3.312942 | 0.793450  | 3.253841  |
| 54 | 8 | 3.312942  | -0.793450 | -3.253841 |

Energy = -1372.2707277Hartree.

### AP-DMP parallel:-

| Center<br>Number | Atomic<br>Number | Coordinates (Angstroms) |           |           |
|------------------|------------------|-------------------------|-----------|-----------|
|                  |                  | X                       | Y         | Z         |
| 1                | 7                | 2.650998                | -1.598450 | 1.756039  |
| 2                | 1                | 2.996379                | -1.157002 | 2.597009  |
| 3                | 1                | 3.040178                | -2.521184 | 1.618641  |
| 4                | 6                | -0.807993               | -0.274795 | 1.918196  |
| 5                | 1                | -1.361501               | 0.528696  | 2.396759  |
| 6                | 6                | 0.551105                | -0.453727 | 2.161574  |
| 7                | 1                | 1.072028                | 0.226085  | 2.830565  |
| 8                | 6                | 1.281145                | -1.486653 | 1.541879  |
| 9                | 8                | -3.758769               | -0.463033 | 0.787739  |
| 10               | 8                | -1.376581               | -3.816093 | -1.248082 |
| 11               | 7                | -2.870098               | -2.284411 | -0.343284 |
| 12               | 1                | -3.667677               | -2.487993 | -0.929334 |
| 13               | 6                | -2.828140               | -1.189350 | 0.526350  |
| 14               | 6                | 0.635248                | -2.365000 | 0.651205  |
| 15               | 1                | 1.170529                | -3.170052 | 0.154539  |
| 16               | 6                | -1.629035               | -2.891916 | -0.513093 |
| 17               | 6                | -0.706271               | -2.157115 | 0.412117  |
| 18               | 6                | -1.427893               | -1.140714 | 1.029145  |
| 19               | 6                | 0.216643                | 2.289232  | 0.004796  |
| 20               | 6                | 1.430705                | 2.648944  | 0.563706  |
| 21               | 1                | 1.502181                | 3.485594  | 1.252228  |
| 22               | 6                | 2.560578                | 1.903409  | 0.231650  |
| 23               | 1                | 3.509094                | 2.180997  | 0.673472  |

|    |   |           |           |           |
|----|---|-----------|-----------|-----------|
| 24 | 6 | 2.497226  | 0.802815  | -0.661250 |
| 25 | 6 | 1.238017  | 0.449853  | -1.217060 |
| 26 | 6 | 3.484207  | -1.169626 | -1.690134 |
| 27 | 1 | 4.471861  | -1.604303 | -1.842421 |
| 28 | 1 | 3.030766  | -1.020370 | -2.674797 |
| 29 | 1 | 2.867096  | -1.884238 | -1.127020 |
| 30 | 6 | 4.853172  | 0.339929  | -0.256967 |
| 31 | 1 | 5.631919  | -0.321452 | -0.636179 |
| 32 | 1 | 4.730727  | 0.157467  | 0.820810  |
| 33 | 1 | 5.192083  | 1.370786  | -0.403303 |
| 34 | 7 | 3.626814  | 0.091076  | -0.986567 |
| 35 | 1 | -3.823059 | 1.455857  | -1.351617 |
| 36 | 1 | 1.113936  | -0.395242 | -1.883699 |
| 37 | 6 | 0.145247  | 1.205625  | -0.865009 |
| 38 | 6 | -1.291001 | 1.013510  | -1.247413 |
| 39 | 6 | -1.155156 | 2.819672  | 0.198128  |
| 40 | 6 | -3.428038 | 2.213249  | -0.674475 |
| 41 | 1 | -3.882937 | 2.088786  | 0.309146  |
| 42 | 1 | -3.638527 | 3.214295  | -1.057955 |
| 43 | 7 | -1.994381 | 2.013999  | -0.587667 |
| 44 | 8 | -1.771079 | 0.158704  | -1.961593 |
| 45 | 8 | -1.539447 | 3.739637  | 0.884865  |

Energy = -1254.4009483Hartree.

|                   |         |          |          |
|-------------------|---------|----------|----------|
| Low Frequencies - | 20.4952 | 24.2645  | 44.6641  |
|                   | 49.6486 | 72.5328  | 86.5265  |
|                   | 96.1554 | 104.0687 | 117.1155 |

### AP-DMP anti parallel:-

| Center<br>Number | Atomic<br>Number | Coordinates (Angstroms) |           |           |
|------------------|------------------|-------------------------|-----------|-----------|
|                  |                  | X                       | Y         | Z         |
| 1                | 7                | -3.536697               | 1.921465  | 0.047162  |
| 2                | 1                | -4.225702               | 1.428728  | 0.597354  |
| 3                | 1                | -3.695109               | 1.817831  | -0.948054 |
| 4                | 6                | -0.603271               | 1.033803  | 2.133140  |
| 5                | 1                | -0.382587               | 0.564981  | 3.087061  |
| 6                | 6                | -1.917082               | 1.215959  | 1.713717  |
| 7                | 1                | -2.733385               | 0.891822  | 2.354610  |
| 8                | 6                | -2.223103               | 1.770623  | 0.452329  |
| 9                | 8                | 2.553394                | 0.810770  | 2.274943  |
| 10               | 8                | 1.585937                | 2.779269  | -1.754192 |
| 11               | 7                | 2.400068                | 1.889268  | 0.228048  |
| 12               | 1                | 3.388031                | 1.946889  | 0.026772  |
| 13               | 6                | 1.886387                | 1.310766  | 1.396658  |
| 14               | 6                | -1.178905               | 2.192685  | -0.396262 |
| 15               | 1                | -1.386836               | 2.616950  | -1.374609 |
| 16               | 6                | 1.404781                | 2.302201  | -0.659307 |
| 17               | 6                | 0.114305                | 2.009954  | 0.044651  |
| 18               | 6                | 0.412776                | 1.435498  | 1.277735  |
| 19               | 6                | -0.796962               | -0.986787 | -1.290372 |
| 20               | 6                | 0.189445                | -0.547621 | -2.161042 |
| 21               | 1                | -0.063326               | -0.046225 | -3.090424 |
| 22               | 6                | 1.518968                | -0.730221 | -1.800086 |

|    |   |           |           |           |
|----|---|-----------|-----------|-----------|
| 23 | 1 | 2.286091  | -0.370273 | -2.474163 |
| 24 | 6 | 1.888634  | -1.330185 | -0.564169 |
| 25 | 6 | 0.861019  | -1.786253 | 0.304720  |
| 26 | 6 | 3.559494  | -2.067679 | 1.057059  |
| 27 | 1 | 4.643353  | -2.051950 | 1.164314  |
| 28 | 1 | 3.224583  | -3.112425 | 1.091797  |
| 29 | 1 | 3.128379  | -1.517938 | 1.900849  |
| 30 | 6 | 4.241538  | -1.017617 | -1.122375 |
| 31 | 1 | 5.212384  | -1.156023 | -0.648547 |
| 32 | 1 | 4.137481  | 0.043122  | -1.385284 |
| 33 | 1 | 4.223884  | -1.599457 | -2.053674 |
| 34 | 7 | 3.203524  | -1.439106 | -0.204427 |
| 35 | 1 | -4.270223 | -1.036142 | 1.203521  |
| 36 | 1 | 1.074221  | -2.236722 | 1.266705  |
| 37 | 6 | -0.443895 | -1.596084 | -0.090246 |
| 38 | 6 | -1.704900 | -1.902750 | 0.655923  |
| 39 | 6 | -2.268813 | -0.839128 | -1.326871 |
| 40 | 6 | -4.134513 | -1.515804 | 0.228779  |
| 41 | 1 | -4.711845 | -0.996827 | -0.538143 |
| 42 | 1 | -4.471800 | -2.552166 | 0.306328  |
| 43 | 7 | -2.745161 | -1.461672 | -0.162050 |
| 44 | 8 | -1.850021 | -2.404301 | 1.747576  |
| 45 | 8 | -2.972453 | -0.274742 | -2.139757 |

Energy = -1254.4070037Hartree.

Low Frequencies -      23.9044      40.4213      46.5370

|         |          |          |
|---------|----------|----------|
| 66.5193 | 77.0071  | 86.7138  |
| 95.1893 | 110.8919 | 127.1189 |
